# Supplementary material for: Proteomic Responses of Roseobacter litoralis OCh149 to Starvation and Light Regimen
Source: PubMed Central journal article supplement (PMC4103551; doi:10.1264/jsme2.me12029), 2012-10-05
Supplement: 27_430_s1.pdf [file 27_430_s1.pdf]

Table S1. Proteins detected at the stationary phase by LC-MS/MS

| Accession No.                                       | Gene        | Protein                                                     | No. of Unique Peptides | Spectral Count | Expression <sup>a</sup> |
|-----------------------------------------------------|-------------|-------------------------------------------------------------|------------------------|----------------|-------------------------|
| <b>Carbon metabolism</b>                            |             |                                                             |                        |                |                         |
| ZP_02139222                                         | <i>zwf</i>  | glucose-6-phosphate- 1-dehydrogenase                        | 2                      | 2              | D                       |
| ZP_02139224                                         | <i>pgi</i>  | glucose-6-phosphate isomerase                               | 2                      | 3              | D                       |
| ZP_02142219                                         | <i>xylA</i> | xylose isomerase                                            | 3                      | 5              | Both                    |
| ZP_02142552                                         | <i>fba</i>  | fructose-bisphosphate aldolase                              | 5                      | 15             | Both                    |
| ZP_02138949                                         | <i>gap</i>  | glyceraldehyde-3-phosphate dehydrogenase                    | 6                      | 16             | Both                    |
| ZP_02143248                                         | <i>eno</i>  | enolase                                                     | 4                      | 20             | Both                    |
| ZP_02138950                                         | <i>edd</i>  | phosphogluconate dehydratase                                | 5                      | 7              | Both                    |
| ZP_02138834                                         | <i>tkt</i>  | transketolase                                               | 4                      | 8              | Both                    |
| ZP_02139737                                         | <i>prs</i>  | ribose-phosphate pyrophosphokinase putative                 | 5                      | 12             | Both                    |
| ZP_02140102                                         | <i>pyk</i>  | pyruvate kinase                                             | 1                      | 3              | L                       |
| ZP_02139594                                         | <i>pyc</i>  | pyruvate carboxylase                                        | 5                      | 6              | D                       |
| ZP_02141600                                         | <i>mdh</i>  | malate dehydrogenase                                        | 12                     | 42             | Both                    |
| ZP_02139440                                         | <i>glcA</i> | citrate synthase                                            | 7                      | 18             | Both                    |
| ZP_02139391                                         | <i>acn</i>  | aconitate hydratase                                         | 4                      | 8              | D                       |
| ZP_02139240                                         | <i>icd</i>  | isocitrate dehydrogenase                                    | 3                      | 4              | D                       |
| ZP_02141063                                         | <i>icd</i>  | isocitrate dehydrogenase, NADP-dependent                    | 6                      | 10             | D                       |
| ZP_02141608                                         | <i>sucA</i> | alpha-ketoglutarate dehydrogenase                           | 9                      | 32             | Both                    |
| ZP_02141609                                         | <i>aceF</i> | dihydrolipoamide acetyltransferase                          | 8                      | 29             | Both                    |
| ZP_02141615                                         | <i>dld</i>  | dihydrolipoamide dehydrogenase                              | 5                      | 15             | Both                    |
| ZP_02138821                                         | <i>dld</i>  | dihydrolipoamide dehydrogenase                              | 2                      | 5              | D                       |
| ZP_02138806                                         | <i>pdhA</i> | pyruvate dehydrogenase complex, E1 component, alpha subunit | 1                      | 3              | D                       |
| ZP_02140209                                         | <i>acs</i>  | acetyl-coenzyme A synthetase                                | 2                      | 3              | D                       |
| ZP_02141602                                         | <i>sucC</i> | succinyl-CoA synthetase, beta subunit                       | 9                      | 28             | Both                    |
| ZP_02141606                                         | <i>sucD</i> | succinyl-CoA synthetase, alpha subunit                      | 8                      | 32             | Both                    |
| ZP_02139761                                         | <i>phaB</i> | acetoacetyl-CoA reductase, putative                         | 5                      | 11             | L                       |
| ZP_02139760                                         | <i>phaA</i> | acetyl-CoA acetyltransferase                                | 7                      | 21             | Both                    |
| ZP_02141951                                         | <i>phaA</i> | acetyl-CoA acetyltransferase                                | 2                      | 3              | D                       |
| ZP_02142486                                         | <i>phaR</i> | polyhydroxyalkanoate synthesis repressor                    | 1                      | 3              | D                       |
| ZP_02141589                                         | <i>sdhA</i> | succinate dehydrogenase flavoprotein subunit                | 2                      | 2              | D                       |
| ZP_02142549                                         | <i>fumC</i> | fumarate hydratase                                          | 5                      | 8              | Both                    |
| ZP_02141689                                         | <i>aldh</i> | aldehyde dehydrogenase family protein, putative             | 2                      | 3              | L                       |
| ZP_02138844                                         | <i>coxM</i> | carbon monoxide dehydrogenase, medium subunit               | 3                      | 8              | Both                    |
| ZP_02139547                                         | <i>glcB</i> | malate synthase G                                           | 8                      | 19             | Both                    |
| ZP_02143293                                         | <i>mxoF</i> | methanol dehydrogenase, large subunit                       | 4                      | 11             | Both                    |
| ZP_02139511                                         | <i>nuoC</i> | NADH dehydrogenase subunit C                                | 3                      | 7              | Both                    |
| ZP_02139499                                         | <i>nuoG</i> | NADH dehydrogenase subunit G                                | 2                      | 2              | D                       |
| <b>Photosynthesis and oxidative phosphorylation</b> |             |                                                             |                        |                |                         |
| ZP_02142898                                         | <i>pufC</i> | photosynthetic reaction center cytochrome c subunit         | 3                      | 9              | Both                    |
| ZP_02141769                                         |             | NADH-ubiquinone oxidoreductase, putative                    | 1                      | 3              | L                       |
| ZP_02142870                                         | <i>cycA</i> | cytochrome c-551                                            | 2                      | 11             | Both                    |
| ZP_02141863                                         | <i>petA</i> | ubiquinol-cytochrome c reductase, iron-sulfur subunit       | 1                      | 3              | L                       |
| ZP_02141343                                         | <i>atpF</i> | ATP synthase F0, B subunit                                  | 4                      | 10             | L                       |
| ZP_02141344                                         | <i>atpX</i> | ATP synthase F0, B' subunit                                 | 4                      | 17             | Both                    |
| ZP_02139743                                         | <i>atpA</i> | F0F1 ATP synthase subunit alpha                             | 16                     | 66             | Both                    |
| ZP_02139741                                         | <i>atpD</i> | F0F1 ATP synthase subunit beta                              | 14                     | 57             | Both                    |
| ZP_02139742                                         | <i>atpG</i> | F0F1 ATP synthase subunit gamma                             | 3                      | 3              | L                       |
| ZP_02142877                                         | <i>bchO</i> | magnesium-chelatase 38 kDa subunit                          | 3                      | 7              | Both                    |
| ZP_02141383                                         | <i>hemC</i> | porphobilinogen deaminase                                   | 6                      | 12             | Both                    |
| ZP_02139198                                         | <i>hemB</i> | delta-aminolevulinic acid dehydratase                       | 3                      | 4              | D                       |
| ZP_02141382                                         | <i>hemE</i> | uroporphyrinogen decarboxylase                              | 3                      | 3              | L                       |
| ZP_02142851                                         | <i>bchP</i> | geranylgeranyl hydrogenase                                  | 4                      | 6              | D                       |
| ZP_02139729                                         | <i>ppaC</i> | inorganic pyrophosphatase, manganese-dependent              | 4                      | 11             | Both                    |
| <b>Fatty acid metabolism</b>                        |             |                                                             |                        |                |                         |
| ZP_02141283                                         | <i>etfA</i> | electron transfer flavoprotein, alpha subunit               | 4                      | 14             | Both                    |
| ZP_02141282                                         | <i>etfB</i> | electron transfer flavoprotein, beta subunit                | 7                      | 21             | Both                    |
| ZP_02140904                                         | <i>mut</i>  | methylmalonyl-CoA mutase                                    | 5                      | 6              | Both                    |
| ZP_02139206                                         | <i>bdh</i>  | D-beta-hydroxybutyrate dehydrogenase                        | 4                      | 11             | Both                    |
| ZP_02141996                                         | <i>fabA</i> | 3-hydroxydecanoyl-ACP dehydratase                           | 2                      | 6              | L                       |
| ZP_02138783                                         | <i>fabB</i> | 3-oxoacyl-(acyl carrier protein) synthase                   | 1                      | 3              | L                       |
| ZP_02141995                                         | <i>fabB</i> | 3-oxoacyl-(acyl-carrier-protein) synthase                   | 3                      | 8              | Both                    |
| ZP_02140699                                         | <i>fadA</i> | beta-ketothiolase                                           | 2                      | 9              | Both                    |
| <b>Amino acid metabolism</b>                        |             |                                                             |                        |                |                         |
| ZP_02139527                                         | <i>glmS</i> | D-fructose-6-phosphate amidotransferase                     | 2                      | 2              | D                       |
| ZP_02140099                                         | <i>dat</i>  | D-alanine aminotransferase                                  | 8                      | 23             | Both                    |
| ZP_02140129                                         | <i>ald</i>  | alanine dehydrogenase                                       | 5                      | 12             | Both                    |
| ZP_02140030                                         | <i>aspC</i> | aspartate aminotransferase                                  | 2                      | 2              | D                       |
| ZP_02142026                                         | <i>aspC</i> | aspartate aminotransferase                                  | 3                      | 6              | Both                    |
| ZP_02140735                                         | <i>adss</i> | adenylosuccinate synthetase                                 | 2                      | 4              | D                       |
| ZP_02140422                                         | <i>argG</i> | argininosuccinate synthase                                  | 2                      | 3              | D                       |
| ZP_02141432                                         | <i>glud</i> | glutamate dehydrogenase                                     | 13                     | 35             | Both                    |
| ZP_02139377                                         | <i>glnA</i> | glutamine synthetase, type I                                | 7                      | 15             | Both                    |

| Accession No.                        | Gene        | Protein                                                                                   | No. of Unique Peptides | Spectral Count | Expression <sup>a</sup> |
|--------------------------------------|-------------|-------------------------------------------------------------------------------------------|------------------------|----------------|-------------------------|
| ZP_02140695                          | <i>serA</i> | D-3-phosphoglycerate dehydrogenase                                                        | 6                      | 7              | Both                    |
| ZP_02138803                          | <i>cysE</i> | serine acetyltransferase                                                                  | 3                      | 11             | Both                    |
| ZP_02139899                          | <i>metB</i> | O-acetylhomoserine sulfhydrylase, probable                                                | 6                      | 14             | Both                    |
| ZP_02138887                          | <i>cysK</i> | O-acetylserine sulfhydrylase                                                              | 5                      | 8              | Both                    |
| ZP_02140777                          | <i>ihvC</i> | ketol-acid reductoisomerase                                                               | 4                      | 6              | Both                    |
| ZP_02140495                          | <i>ihvD</i> | dihydroxy-acid dehydratase                                                                | 4                      | 14             | Both                    |
| ZP_02141873                          | <i>ihvE</i> | branched-chain amino acid aminotransferase                                                | 2                      | 4              | L                       |
| ZP_02142012                          | <i>trpB</i> | tryptophan synthase subunit beta                                                          | 2                      | 2              | L                       |
| ZP_02142022                          | <i>trpA</i> | tryptophan synthase, alpha subunit                                                        | 2                      | 8              | Both                    |
| ZP_02140521                          | <i>asd</i>  | aspartate-semialdehyde dehydrogenase                                                      | 2                      | 2              | L                       |
| ZP_02140022                          | <i>aldh</i> | succinate-semialdehyde dehydrogenase                                                      | 2                      | 3              | D                       |
| ZP_02138804                          | <i>dbt</i>  | branched-chain alpha-keto acid dehydrogenase E2 subunit                                   | 4                      | 15             | Both                    |
| ZP_02142003                          | <i>metK</i> | S-adenosylmethionine synthase                                                             | 3                      | 4              | D                       |
| ZP_02140697                          | <i>kbl</i>  | 2-amino-3-ketobutyrate coenzyme A ligase                                                  | 7                      | 19             | Both                    |
| ZP_02140726                          | <i>leuB</i> | 3-isopropylmalate dehydrogenase                                                           | 4                      | 7              | D                       |
| ZP_02140069                          | <i>dapA</i> | dihydrodipicolinate synthase                                                              | 2                      | 8              | Both                    |
| ZP_02140763                          | <i>metZ</i> | O-succinylhomoserine sulfhydrylase                                                        | 2                      | 3              | D                       |
| ZP_02143223                          | <i>lap</i>  | leucyl aminopeptidase                                                                     | 9                      | 17             | Both                    |
| ZP_02140378                          | <i>ahcY</i> | S-adenosyl-L-homocysteine hydrolase                                                       | 2                      | 4              | D                       |
| ZP_02143463                          | <i>hpcE</i> | 2-hydroxyhepta-2,4-diene-1,7-dioate isomerase, putative                                   | 4                      | 13             | Both                    |
| <b>Purine/pyrimidine metabolism</b>  |             |                                                                                           |                        |                |                         |
| ZP_02141744                          | <i>trx</i>  | thioredoxin, putative                                                                     | 1                      | 3              | L                       |
| ZP_02143344                          | <i>pyrF</i> | orotidine 5'-phosphate decarboxylase                                                      | 1                      | 3              | L                       |
| ZP_02142635                          | <i>hydA</i> | dihydropyrimidinase                                                                       | 1                      | 3              | D                       |
| ZP_02139228                          | <i>guaB</i> | inosine-5'-monophosphate dehydrogenase                                                    | 5                      | 14             | Both                    |
| ZP_02139386                          | <i>purA</i> | adenylosuccinate lyase                                                                    | 1                      | 4              | L                       |
| ZP_02143216                          | <i>ndk</i>  | nucleoside diphosphate kinase                                                             | 2                      | 5              | L                       |
| ZP_02140707                          | <i>dnaN</i> | DNA polymerase III subunit beta                                                           | 8                      | 27             | Both                    |
| ZP_02141714                          | <i>pnp</i>  | polyribonucleotide nucleotidyltransferase                                                 | 7                      | 14             | Both                    |
| ZP_02141694                          | <i>purH</i> | bifunctional phosphoribosylaminoimidazolecarboxamide formyltransferase/IMP cyclohydrolase | 2                      | 6              | Both                    |
| ZP_02141965                          |             | putative 5-nucleotidase                                                                   | 2                      | 4              | Both                    |
| <b>Transcription and translation</b> |             |                                                                                           |                        |                |                         |
| ZP_02139347                          | <i>ctrA</i> | transcriptional regulator CtrA                                                            | 3                      | 7              | Both                    |
| ZP_02140320                          | <i>nusG</i> | transcription antitermination protein NusG                                                | 2                      | 3              | D                       |
| ZP_02140406                          | <i>rho</i>  | transcription termination factor Rho                                                      | 4                      | 7              | Both                    |
| ZP_02140449                          | <i>nusA</i> | transcription elongation factor NusA                                                      | 2                      | 2              | L                       |
| ZP_02140784                          | <i>gntR</i> | transcriptional regulator, GntR family, putative                                          | 2                      | 2              | D                       |
| ZP_02140451                          | <i>infB</i> | translation initiation factor IF-2                                                        | 2                      | 2              | L                       |
| ZP_02138847                          | <i>infC</i> | translation initiation factor IF-3                                                        | 2                      | 8              | Both                    |
| ZP_02140330                          | <i>fusA</i> | elongation factor G                                                                       | 12                     | 25             | Both                    |
| ZP_02139299                          | <i>tsf</i>  | elongation factor Ts                                                                      | 3                      | 11             | Both                    |
| ZP_02140331                          | <i>tuf</i>  | elongation factor Tu                                                                      | 14                     | 45             | Both                    |
| ZP_02142008                          | <i>rpsA</i> | 30S ribosomal protein S1                                                                  | 2                      | 3              | D                       |
| ZP_02141271                          | <i>rpsJ</i> | 30S ribosomal protein S10                                                                 | 2                      | 7              | Both                    |
| ZP_02141226                          | <i>rpsK</i> | 30S ribosomal protein S11                                                                 | 4                      | 7              | Both                    |
| ZP_02141227                          | <i>rpsM</i> | 30S ribosomal protein S13                                                                 | 7                      | 16             | Both                    |
| ZP_02139298                          | <i>rpsB</i> | 30S ribosomal protein S2                                                                  | 3                      | 5              | Both                    |
| ZP_02141261                          | <i>rpsC</i> | 30S ribosomal protein S3                                                                  | 3                      | 7              | Both                    |
| ZP_02139757                          | <i>rpsD</i> | 30S ribosomal protein S4                                                                  | 7                      | 18             | Both                    |
| ZP_02138774                          | <i>rpsF</i> | 30S ribosomal protein S6                                                                  | 2                      | 3              | D                       |
| ZP_02140329                          | <i>rpsG</i> | 30S ribosomal protein S7                                                                  | 3                      | 13             | Both                    |
| ZP_02141242                          | <i>rpsH</i> | 30S ribosomal protein S8                                                                  | 2                      | 10             | Both                    |
| ZP_02140322                          | <i>rplA</i> | 50S ribosomal protein L1                                                                  | 1                      | 3              | D                       |
| ZP_02140321                          | <i>rplK</i> | 50S ribosomal protein L11                                                                 | 1                      | 3              | L                       |
| ZP_02141246                          | <i>rplN</i> | 50S ribosomal protein L14                                                                 | 1                      | 3              | L                       |
| ZP_02141260                          | <i>rplP</i> | 50S ribosomal protein L16                                                                 | 2                      | 7              | Both                    |
| ZP_02141224                          | <i>rplQ</i> | 50S ribosomal protein L17                                                                 | 1                      | 3              | L                       |
| ZP_02141240                          | <i>rplR</i> | 50S ribosomal protein L18                                                                 | 3                      | 10             | Both                    |
| ZP_02141361                          | <i>rplS</i> | 50S ribosomal protein L19                                                                 | 2                      | 10             | Both                    |
| ZP_02140106                          | <i>rplT</i> | 50S ribosomal protein L20                                                                 | 2                      | 4              | D                       |
| ZP_02139285                          | <i>rplU</i> | 50S ribosomal protein L21/unknown domain fusion protein                                   | 4                      | 14             | Both                    |
| ZP_02141262                          | <i>rplV</i> | 50S ribosomal protein L22                                                                 | 2                      | 3              | D                       |
| ZP_02141268                          | <i>rplW</i> | 50S ribosomal protein L23                                                                 | 1                      | 3              | L                       |
| ZP_02139286                          | <i>rplA</i> | 50S ribosomal protein L27                                                                 | 1                      | 3              | D                       |
| ZP_02141238                          | <i>rplD</i> | 50S ribosomal protein L30                                                                 | 1                      | 3              | L                       |
| ZP_02141269                          | <i>rplD</i> | 50S ribosomal protein L4                                                                  | 2                      | 2              | L                       |
| ZP_02141241                          | <i>rplF</i> | 50S ribosomal protein L6                                                                  | 2                      | 3              | D                       |
| ZP_02138772                          | <i>rplI</i> | 50S ribosomal protein L9                                                                  | 5                      | 13             | Both                    |
| ZP_02141233                          | <i>rplO</i> | 50S ribosomal protein L15                                                                 | 3                      | 5              | Both                    |
| ZP_02141264                          | <i>rplB</i> | 50S ribosomal protein L2                                                                  | 4                      | 13             | Both                    |
| ZP_02141541                          | <i>rplB</i> | 50S ribosomal protein L28                                                                 | 1                      | 3              | D                       |
| ZP_02140311                          | <i>hisS</i> | histidyl-tRNA synthetase                                                                  | 2                      | 2              | L                       |
| ZP_02141225                          | <i>rpoA</i> | DNA-directed RNA polymerase subunit alpha                                                 | 6                      | 17             | Both                    |

| Accession No.         | Gene         | Protein                                                                          | No. of Unique Peptides | Spectral Count | Expression <sup>a</sup> |
|-----------------------|--------------|----------------------------------------------------------------------------------|------------------------|----------------|-------------------------|
| ZP_02140325           | <i>rpoB</i>  | DNA-directed RNA polymerase subunit beta                                         | 10                     | 13             | Both                    |
| ZP_02140326           | <i>rpoC</i>  | DNA-directed RNA polymerase subunit beta'                                        | 7                      | 20             | Both                    |
| ZP_02139949           | <i>hup</i>   | DNA-binding protein HU                                                           | 3                      | 21             | Both                    |
| ZP_02141747           | <i>mtrA</i>  | DNA-binding response regulator, putative                                         | 1                      | 3              | L                       |
| ZP_02142009           | <i>ihfB</i>  | integration host factor subunit beta                                             | 2                      | 3              | D                       |
| ZP_02143263           | <i>ihfA</i>  | integration host factor, alpha subunit                                           | 3                      | 6              | Both                    |
| <b>Stress protein</b> |              |                                                                                  |                        |                |                         |
| ZP_02140416           | <i>grpE</i>  | GrpE protein HSP-70 cofactor, putative                                           | 1                      | 3              | L                       |
| ZP_02138972           | <i>clpS</i>  | Clp protease, putative                                                           | 3                      | 10             | Both                    |
| ZP_02142235           | <i>htpG</i>  | heat shock protein 90                                                            | 3                      | 6              | Both                    |
| ZP_02139975           | <i>hspH</i>  | heat shock protein, Hsp20 family                                                 | 3                      | 18             | Both                    |
| ZP_02139716           |              | heat shock protein, Hsp20 family, putative                                       | 3                      | 10             | Both                    |
| ZP_02140459           | <i>dnaK</i>  | chaperone protein DnaK, putative                                                 | 12                     | 44             | Both                    |
| ZP_02139724           | <i>groEL</i> | chaperonin GroEL                                                                 | 34                     | 122            | Both                    |
| ZP_02139725           | <i>groES</i> | chaperonin, 10 kDa                                                               | 5                      | 21             | Both                    |
| ZP_02143343           | <i>clpB</i>  | ATP-dependent Clp protease, ATP-binding subunit ClpB                             | 17                     | 53             | Both                    |
| ZP_02138876           | <i>lon</i>   | ATP-dependent protease La, putative                                              | 2                      | 2              | D                       |
| ZP_02139249           | <i>sufC</i>  | FeS assembly ATPase SufC                                                         | 3                      | 8              | Both                    |
| ZP_02141718           |              | antioxidant, AhpC/Tsa family, putative                                           | 2                      | 4              | D                       |
| ZP_02141447           | <i>sodB</i>  | superoxide dismutase (Fe)                                                        | 3                      | 7              | Both                    |
| ZP_02140855           | <i>telA</i>  | tellurite resistance protein TelA                                                | 5                      | 10             | Both                    |
| ZP_02141709           |              | universal stress family protein, putative                                        | 2                      | 3              | D                       |
| ZP_02140300           |              | universal stress family protein, putative                                        | 1                      | 3              | L                       |
| ZP_02141690           | <i>pqqE</i>  | peptidase, M16 family, putative                                                  | 2                      | 3              | D                       |
| ZP_02141305           | <i>lepB</i>  | signal peptidase I, putative                                                     | 2                      | 3              | L                       |
| <b>Chemotaxis</b>     |              |                                                                                  |                        |                |                         |
| ZP_02142765           | <i>mcpA</i>  | methyl-accepting chemotaxis protein McpA                                         | 13                     | 40             | Both                    |
| ZP_02142731           |              | methyl-accepting chemotaxis protein, putative                                    | 9                      | 13             | D                       |
| ZP_02141023           |              | methyl-accepting chemotaxis protein, putative                                    | 8                      | 13             | L                       |
| ZP_02138875           |              | chemoreceptor protein, putative                                                  | 1                      | 3              | L                       |
| ZP_02138757           | <i>cheA</i>  | chemotaxis protein CheA                                                          | 2                      | 7              | Both                    |
| ZP_02138758           | <i>cheA</i>  | chemotaxis protein CheA                                                          | 2                      | 3              | L                       |
| ZP_02138756           | <i>cheW</i>  | chemotaxis protein CheW                                                          | 2                      | 7              | Both                    |
| <b>Transporters</b>   |              |                                                                                  |                        |                |                         |
| ZP_02141887           |              | ABC transporter substrate binding protei                                         | 4                      | 7              | Both                    |
| ZP_02142663           |              | ABC transporter, ATP-binding protein, putative                                   | 3                      | 3              | D                       |
| ZP_02142631           |              | ABC transporter, periplasmic                                                     | 2                      | 7              | Both                    |
| ZP_02142041           |              | ABC transporter, periplasmic substrate-binding protein, putative                 | 3                      | 6              | D                       |
| ZP_02142337           |              | ABC transporter, substrate-binding protein, putative                             | 2                      | 10             | Both                    |
| ZP_02140622           |              | ABC transporter, substrate-binding protein, putative                             | 2                      | 12             | Both                    |
| ZP_02142689           |              | amino-acid ABC transporter, periplasmic binding protein                          | 2                      | 4              | L                       |
| ZP_02141504           |              | bacterial extracellular solute-binding protein, family 7                         | 4                      | 10             | Both                    |
| ZP_02142163           |              | bacterial extracellular solute-binding protein, family 7,putative                | 2                      | 2              | L                       |
| ZP_02140148           |              | C4-dicarboxylate transport system, substrate-binding protein, putative           | 4                      | 7              | Both                    |
| ZP_02141381           |              | C4-dicarboxylate-binding periplasmic protein                                     | 4                      | 8              | Both                    |
| ZP_02143160           |              | Extracellular ligand-binding receptor                                            | 2                      | 12             | Both                    |
| ZP_02139643           |              | extracellular solute-binding protein, family 1                                   | 4                      | 6              | Both                    |
| ZP_02139683           |              | extracellular solute-binding protein, family 1                                   | 1                      | 3              | L                       |
| ZP_02141083           |              | extracellular solute-binding protein, putative                                   | 6                      | 16             | Both                    |
| ZP_02143007           |              | ferric iron ABC transporter, periplasmic ferric iron-binding protein             | 9                      | 50             | Both                    |
| ZP_02141218           |              | glutamate/glutamine/aspartate/asparagine-binding protein                         | 21                     | 230            | Both                    |
| ZP_02139636           |              | glycerol-3-phosphate ABC transporter, periplasmic binding protein                | 8                      | 24             | Both                    |
| ZP_02138889           |              | glycerol-3-phosphate-binding periplasmic protein precursor, putative             | 6                      | 22             | Both                    |
| ZP_02143318           |              | ribose ABC transporter, periplasmic binding component, putative                  | 2                      | 6              | Both                    |
| ZP_02140156           |              | iron ABC transporter iron-binding protein, putative                              | 2                      | 2              | L                       |
| ZP_02139537           |              | peptide ABC transporter, periplasmic substrate-binding protein                   | 4                      | 6              | Both                    |
| ZP_02139021           |              | periplasmic mannitol-binding protein, putative                                   | 5                      | 12             | Both                    |
| ZP_02139307           |              | phosphate ABC transporter, periplasmic phosphate-binding protein                 | 1                      | 3              | L                       |
| ZP_02140153           |              | phosphonate ABC transporter, periplasmic binding protein, putative               | 3                      | 5              | Both                    |
| ZP_02140643           |              | probable binding protein component of ABC transporter                            | 3                      | 4              | L                       |
| ZP_02139688           |              | putative iron ABC transporter, periplasmic binding protein                       | 3                      | 6              | Both                    |
| ZP_02141570           |              | putative sugar ABC transporter, periplasmic sugar-binding protein                | 3                      | 12             | Both                    |
| ZP_02141905           |              | putative sugar ABC transporter, periplasmic sugar-binding protein                | 2                      | 3              | D                       |
| ZP_02142183           |              | solute-binding protein, putative                                                 | 9                      | 30             | Both                    |
| ZP_02140549           |              | spermidine/putrescine-binding periplasmic protein, putative                      | 4                      | 10             | Both                    |
| ZP_02141152           |              | sugar ABC transporter, periplasmic binding protein, putative                     | 5                      | 12             | Both                    |
| ZP_02141492           |              | sugar ABC transporter, periplasmic sugar-binding protein                         | 5                      | 11             | Both                    |
| ZP_02140246           |              | sugar ABC transporter, periplasmic sugar-binding protein, putative               | 5                      | 21             | Both                    |
| ZP_02142319           |              | sugar ABC transporter, substrate-binding, putative                               | 2                      | 2              | D                       |
| ZP_02140347           |              | TRAP dicarboxylate ABC transporter, substrate-binding protein                    | 6                      | 13             | Both                    |
| ZP_02142421           |              | TRAP transporter solute receptor, TAXI family protein                            | 3                      | 9              | Both                    |
| ZP_02138916           |              | tungstate ABC transporter, tungstate-binding protein                             | 1                      | 3              | D                       |
| ZP_02138986           |              | branched-chain amino acid ABC transporter, periplasmic binding protein, putative | 2                      | 4              | L                       |

| Accession No.                | Gene        | Protein                                                                                  | No. of Unique Peptides | Spectral Count | Expression <sup>a</sup> |
|------------------------------|-------------|------------------------------------------------------------------------------------------|------------------------|----------------|-------------------------|
| ZP_02139318                  |             | branched-chain amino acid ABC transporter, periplasmic substrate-binding protein         | 2                      | 11             | Both                    |
| ZP_02143182                  |             | TRAP-type C4-dicarboxylate transport system protein, putative                            | 3                      | 3              | D                       |
| ZP_02141634                  |             | TRAP-type transporter, putative                                                          | 1                      | 5              | L                       |
| ZP_02140273                  |             | TRAP dicarboxylate transporter, DctP subunit, putative                                   | 5                      | 15             | Both                    |
| ZP_02141071                  |             | sugar ABC transporter protein, putative                                                  | 8                      | 25             | Both                    |
| ZP_02141215                  |             | ABC transporter related protein                                                          | 3                      | 5              | D                       |
| ZP_02141751                  |             | outer membrane porin, putative                                                           | 21                     | 203            | Both                    |
| <b>Others</b>                |             |                                                                                          |                        |                |                         |
| ZP_02139399                  | <i>secD</i> | protein-export membrane protein SecD, putative                                           | 2                      | 3              | D                       |
| ZP_02140400                  | <i>secB</i> | protein-export protein SecB, putative                                                    | 3                      | 4              | Both                    |
| ZP_02138769                  | <i>tig</i>  | trigger factor                                                                           | 3                      | 8              | Both                    |
| ZP_02140455                  | <i>secA</i> | preprotein translocase ATPase subunit                                                    | 2                      | 3              | D                       |
| ZP_02140633                  | <i>dapD</i> | 2,3,4,5-tetrahydropyridine-2-carboxylate N-succinyltransferase                           | 1                      | 3              | L                       |
| ZP_02141057                  | <i>apbA</i> | 2-dehydropantoate 2-reductase, putative                                                  | 2                      | 3              | D                       |
| ZP_02140461                  | <i>cysQ</i> | 3'(2'),5'-bisphosphate nucleotidase                                                      | 2                      | 2              | D                       |
| ZP_02141896                  | <i>ats</i>  | arylsulfatase                                                                            | 8                      | 29             | Both                    |
| ZP_02142699                  |             | bifunctional phosphopantothenoylecysteine decarboxylase/<br>phosphopantothenate synthase | 1                      | 3              | D                       |
| ZP_02141463                  |             | dehydrogenase, putative                                                                  | 3                      | 7              | Both                    |
| ZP_02140970                  |             | formate--tetrahydrofolate ligase                                                         | 7                      | 17             | Both                    |
| ZP_02140746                  |             | HflC protein, putative                                                                   | 7                      | 27             | Both                    |
| ZP_02140745                  |             | HflK protein, putative                                                                   | 3                      | 8              | Both                    |
| ZP_02140257                  |             | immunogenic protein, putative                                                            | 7                      | 14             | Both                    |
| ZP_02143012                  |             | lipoprotein, putative                                                                    | 9                      | 19             | Both                    |
| ZP_02142241                  |             | L-sorbose dehydrogenase, putative                                                        | 3                      | 6              | Both                    |
| ZP_02142682                  |             | metallo-beta-lactamase family protein, putative                                          | 2                      | 3              | L                       |
| ZP_02141067                  |             | myo-inositol-1-monophosphatase                                                           | 1                      | 3              | D                       |
| ZP_02139542                  |             | NAD(P) transhydrogenase subunit alpha                                                    | 4                      | 13             | Both                    |
| ZP_02140465                  |             | sigma-54 modulation protein, putative                                                    | 2                      | 4              | D                       |
| ZP_02142792                  |             | sulfatase, putative                                                                      | 5                      | 17             | Both                    |
| ZP_02141567                  |             | NifU-like domain protein                                                                 | 3                      | 4              | D                       |
| ZP_02139004                  |             | outer membrane protein, putative                                                         | 2                      | 3              | L                       |
| ZP_02139355                  |             | outer membrane protein, putative                                                         | 13                     | 26             | Both                    |
| ZP_02138809                  |             | peptidyl-prolyl cis-trans isomerase, cyclophilin-type, putative                          | 2                      | 4              | D                       |
| ZP_02139426                  |             | peptidyl-prolyl cis-trans isomerase D, putative                                          | 2                      | 4              | D                       |
| ZP_02140454                  |             | PPIC-type PPIASE domain protein                                                          | 2                      | 4              | L                       |
| ZP_02140138                  |             | quinone oxidoreductase                                                                   | 2                      | 3              | D                       |
| ZP_02141983                  |             | racemase, putative                                                                       | 3                      | 7              | Both                    |
| <b>Hypothetical proteins</b> |             |                                                                                          |                        |                |                         |
| ZP_02140172                  |             | unkown protein                                                                           | 1                      | 3              | L                       |
| ZP_02140370                  |             | unkown protein                                                                           | 5                      | 10             | Both                    |
| ZP_02143493                  |             | unkown protein                                                                           | 4                      | 14             | Both                    |
| ZP_02142986                  |             | unkown protein                                                                           | 8                      | 19             | Both                    |
| ZP_02140398                  |             | unkown protein                                                                           | 5                      | 12             | Both                    |
| ZP_02143444                  |             | unkown protein                                                                           | 7                      | 18             | Both                    |
| ZP_02140608                  |             | unkown protein                                                                           | 10                     | 25             | Both                    |
| ZP_02140971                  |             | unkown protein                                                                           | 1                      | 3              | L                       |
| ZP_02141129                  |             | unkown protein                                                                           | 2                      | 3              | D                       |
| ZP_02141554                  |             | unkown protein                                                                           | 1                      | 3              | L                       |
| ZP_02141566                  |             | unkown protein                                                                           | 2                      | 3              | D                       |
| ZP_02141893                  |             | unkown protein                                                                           | 3                      | 3              | D                       |
| ZP_02142485                  |             | unkown protein                                                                           | 5                      | 23             | Both                    |
| ZP_02142561                  |             | unkown protein                                                                           | 4                      | 6              | D                       |
| ZP_02142651                  |             | unkown protein                                                                           | 2                      | 3              | L                       |
| ZP_02142704                  |             | unkown protein                                                                           | 1                      | 3              | L                       |
| ZP_02142653                  |             | unkown protein                                                                           | 4                      | 12             | Both                    |
| ZP_02142882                  |             | unkown protein                                                                           | 2                      | 2              | L                       |
| ZP_02143014                  |             | unkown protein                                                                           | 4                      | 21             | Both                    |
| ZP_02142987                  |             | unkown protein                                                                           | 2                      | 2              | L                       |
| ZP_02143024                  |             | unkown protein                                                                           | 3                      | 4              | D                       |
| ZP_02140098                  |             | unkown protein                                                                           | 5                      | 14             | Both                    |
| ZP_02140097                  |             | unkown protein                                                                           | 13                     | 54             | Both                    |
| ZP_02139612                  |             | unkown protein                                                                           | 7                      | 25             | Both                    |
| ZP_02138812                  |             | unkown protein                                                                           | 3                      | 8              | Both                    |
| ZP_02138766                  |             | unkown protein                                                                           | 2                      | 3              | D                       |

<sup>a</sup>D means that the protein is solely expressed in dark condition; L means that the protein is solely expressed in light regimen condition; Both means that the protein is expressed under both conditions.

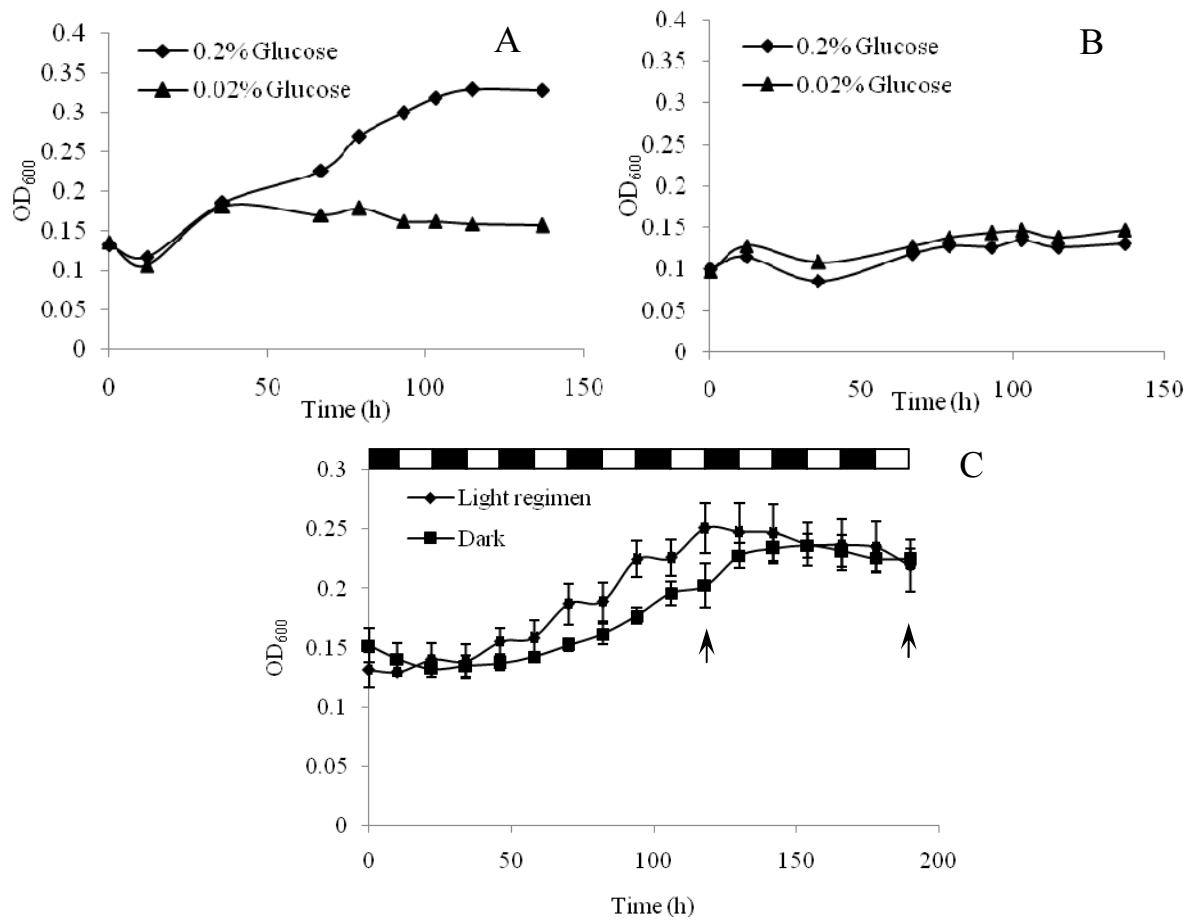

**Fig. S1.** Growth curves determined by measuring the optical density at 600 nm. (A, B) Growth curves of *R. litoralis* OCh149 (A) and *Erythrobacter litoralis* DSM8509 (B) in MMM containing 0.2% and 0.02% glucose. (C) Growth curves of *R. litoralis* OCh149 in MMM containing 0.2% glucose in both light regimen and dark conditions. The top zebra stripe indicates the dark:light (12 h:12 h) cycles of the light regimen. The arrows shows the sampling points for proteomic analysis.
